# Supplementary material for: Psgl-1 Deficiency is Protective against Stroke in a Murine Model of Lupus
Source: PubMed Central journal article supplement (PMC4928054; doi:10.1038/srep28997), 2016-06-30
Supplement: srep28997-s1.pdf [file srep28997-s1.pdf]

# **Psgl-1 Deficiency is Protective against Stroke in a Murine Model of Lupus**

**Short title: Psgl-1 and stroke in lupus**

Hui Wang<sup>1</sup>, Jason S. Knight<sup>2</sup>, Jeffrey B. Hodgin<sup>3</sup>, Jintao Wang<sup>1</sup>, Chiao Guo<sup>1</sup>, Kyle Kleiman<sup>1</sup>, Daniel T. Eitzman<sup>1\*</sup>

1 University of Michigan, Department of Internal Medicine, Cardiovascular Research Center,  
Ann Arbor, Michigan, USA

2 University of Michigan, Department of Internal Medicine, Division of Rheumatology, Ann  
Arbor, Michigan, USA

3 University of Michigan, Department of Pathology, Ann Arbor, Michigan, USA

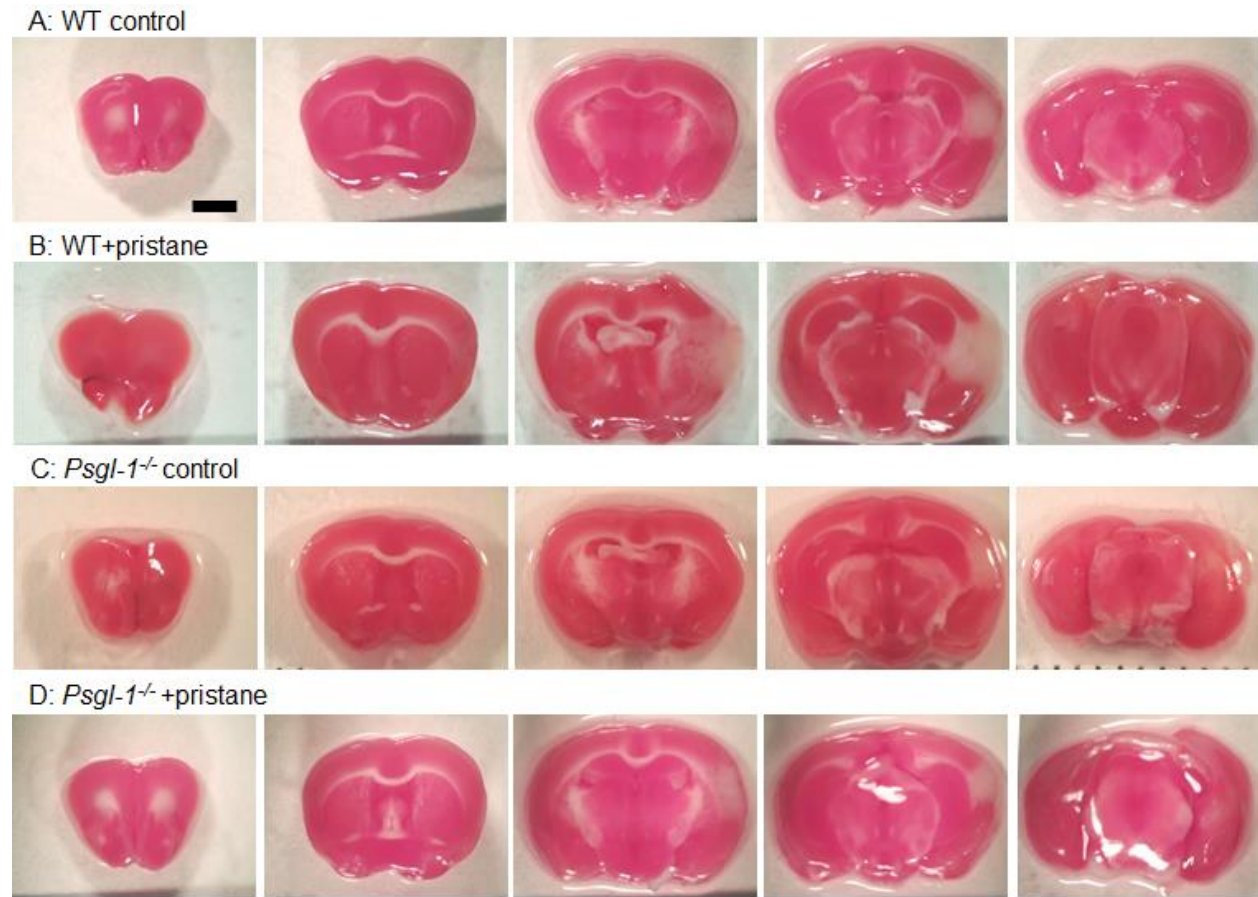

**Supplemental Figure 1.** Representative sections of brain after stroke stained with TTC. A, B, C, D: Serial rostral (left) to caudal (right) coronal sections of brain slides from control WT (A), pristane-treated WT (B), control *Psgl-1*<sup>-/-</sup> (C), and pristane-treated *Psgl-1*<sup>-/-</sup> mice (D). Scale: 2mm.
